# Supplementary material for: Associations Between Maternal Antenatal Corticosteroid Treatment and Psychological Developmental and Neurosensory Disorders in Children
Source: PubMed Central journal article supplement (PMC9403777; doi:10.1001/jamanetworkopen.2022.28518), 2022-08-24
Supplement: jamanetwopen-e2228518-s001.pdf [file jamanetwopen-e2228518-s001.pdf]

## Supplementary Online Content

Räikkönen K, Gissler M, Tapiainen T, Kajantie E. Associations between maternal antenatal corticosteroid treatment and psychological developmental and neurosensory disorders in children. *JAMA Netw Open*. 2022;5(8):e2228518.

doi:10.1001/jamanetworkopen.2022.28518

**eTable 1.** Comparison of Children and Mothers With Complete and Missing Data

**eTable 2.** Median Age and Interquartile Range (IQR) at First Diagnosis of Psychological Developmental and Neurosensory Disorders in Children According to Maternal Antenatal Corticosteroid Treatment Exposure

**eTable 3.** Adjusted Hazard Ratios (HR) of Psychological Developmental and Neurosensory Disorders in Children Without Major Congenital Anomalies According to Maternal Antenatal Corticosteroid Treatment Exposure

**eTable 4.** Adjusted Hazard Ratios (HR) of Psychological Developmental and Neurosensory Disorders in Children Born in 2006-2008 and 2009-2017 According to Maternal Antenatal Corticosteroid Treatment Exposure

This supplementary material has been provided by the authors to give readers additional information about their work.

| <b>eTable 1.</b> Comparison of Children and Mothers With Complete and Missing Data |                                               |                                             |          |
|------------------------------------------------------------------------------------|-----------------------------------------------|---------------------------------------------|----------|
| <b>Characteristics</b>                                                             | <b>Entire cohort<br/>N=670097</b>             |                                             | <b>P</b> |
|                                                                                    | <b>Complete data<br/>N=642158<sup>a</sup></b> | <b>Missing data<br/>N=27939<sup>a</sup></b> |          |
| <b>Children:</b>                                                                   |                                               |                                             |          |
| Maternal antenatal corticosteroid treatment, no. %                                 |                                               |                                             |          |
| Treatment-exposed                                                                  | 14229 (2.2)                                   | 639 (2.3)                                   | .43      |
| Nonexposed                                                                         | 627929 (97.8)                                 | 27300 (97.7)                                |          |
| Sex, no. (%)                                                                       |                                               |                                             |          |
| Boy                                                                                | 328391 (51.1)                                 | 14171 (50.7)                                | .17      |
| Girl                                                                               | 313767 (48.9)                                 | 13768 (49.3)                                |          |
| Gestational age at birth, mean (SD), weeks                                         | 39.8 (1.6)                                    | 39.6 (2.0)                                  | <.001    |
| Birth weight, mean (SD), g                                                         | 3530 (525)                                    | 3496 (567)                                  | <.001    |
| Apgar score (maximum of 1 and 5 minutes) <sup>b</sup>                              |                                               |                                             |          |
| 0-3                                                                                | 9683 (1.5)                                    | 477 (1.7)                                   | .004     |
| 4-6                                                                                | 27292 (4.3)                                   | 1117 (4.0)                                  |          |
| 7-10                                                                               | 605183 (94.2)                                 | 26345 (94.3)                                |          |
| Admission to neonatal intensive care unit, no. (%)                                 |                                               |                                             |          |
| No                                                                                 | 576991 (89.9)                                 | 24732 (88.5)                                | <.001    |
| Yes                                                                                | 65167 (10.1)                                  | 3207 (11.5)                                 |          |
| Major congenital anomaly, no. (%)                                                  |                                               |                                             |          |
| No                                                                                 | 612314 (95.4)                                 | 26549 (95.0)                                | <.001    |
| Yes                                                                                | 29844 (4.6)                                   | 1390 (5.0)                                  |          |
| <b>Mothers:</b>                                                                    |                                               |                                             |          |
| Age at delivery, mean (SD), years                                                  | 30.3 (5.3)                                    | 30.2 (5.6)                                  | .06      |
| Parity, no. (%)                                                                    |                                               |                                             |          |
| 0                                                                                  | 268681 (41.8)                                 | 9958 (35.6)                                 | <.001    |
| 1                                                                                  | 217305 (33.8)                                 | 9759 (34.9)                                 |          |
| 2                                                                                  | 93427 (14.5)                                  | 4643 (16.6)                                 |          |
| 3                                                                                  | 32095 (5.0)                                   | 1779 (6.4)                                  |          |
| ≥4                                                                                 | 30650 (4.8)                                   | 1800 (6.4)                                  |          |
| Delivery mode, no. (%)                                                             |                                               |                                             |          |
| Vaginal                                                                            | 540682 (84.2)                                 | 23123 (82.8)                                | <.001    |
| Caesarean                                                                          | 101476 (15.8)                                 | 4816 (17.2)                                 |          |
| Pre-pregnancy body mass index, mean (SD), kg/m <sup>2</sup>                        | 24.4 (4.9)                                    | 24.7 (5.1)                                  | <.001    |
| Premature rupture of membranes, no. (%) <sup>c</sup>                               |                                               |                                             |          |
| No                                                                                 | 622971 (97.0)                                 | 27315 (97.8)                                | <.001    |
| Yes                                                                                | 19187 (3.0)                                   | 624 (2.2)                                   |          |
| Gestational diabetes, no. (%) <sup>c</sup>                                         |                                               |                                             |          |

|                                                                |               |              |       |
|----------------------------------------------------------------|---------------|--------------|-------|
| No                                                             | 568889 (88.6) | 24988 (89.4) | <.001 |
| Yes                                                            | 73269 (11.4)  | 2951 (10.6)  |       |
| Hypertension, no. (%) <sup>c</sup>                             |               |              |       |
| No                                                             | 615609 (95.9) | 26756 (95.8) | .41   |
| Yes                                                            | 26549 (4.1)   | 1183 (4.2)   |       |
| Any mental or behavioral disorder, no. (%) <sup>c</sup>        |               |              |       |
| No                                                             | 523307 (81.5) | 22128 (79.2) | <.001 |
| Yes                                                            | 118851 (18.5) | 5811 (20.8)  |       |
| Any eye, adnexa, ear or mastoid disorder, no. (%) <sup>c</sup> |               |              |       |
| No                                                             | 598360 (93.2) | 25906 (92.7) | .003  |
| Yes                                                            | 43798 (6.8)   | 2033 (7.3)   |       |
| Any nervous system disorder, no. (%) <sup>c</sup>              |               |              |       |
| No                                                             | 607857 (94.7) | 26297 (94.1) | <.001 |
| Yes                                                            | 34301 (5.3)   | 1642 (5.9)   |       |
| Smoking during pregnancy, no. (%) <sup>c</sup>                 |               |              |       |
| No                                                             | 545151 (84.9) | 26296 (94.1) | <.001 |
| Yes                                                            | 97007 (15.1)  | 1643 (5.9)   |       |

<sup>a</sup>Percentages may not total up to 100% due to rounding.

<sup>b</sup>The Apgar score is calculated at 1 and 5 minutes after birth, uses skin color, pulse rate, reflexes, muscle tone, and respiratory effort to determine medical attention: Scores 0-3 suggest a need for resuscitation, while scores of 7 or more are considered normal.

<sup>c</sup>International Statistical Classification of Diseases and Related Health problems, tenth revision codes: Premature rupture of membranes, O42; Gestational diabetes, O24; Hypertension, O10, O13-O15; Any mental or behavioral disorder, F00-F99; Any eye, adnexa, ear, or mastoid disorder, H00-H95; Any nervous system disorder, G00-G99.

| <b>eTable 2. Median Age and Interquartile Range (IQR) at First Diagnosis of Psychological Developmental and Neurosensory Disorders in Children According to Maternal Antenatal Corticosteroid Treatment Exposure</b> |                                   |                       |                                 |                        |                                 |                       |
|----------------------------------------------------------------------------------------------------------------------------------------------------------------------------------------------------------------------|-----------------------------------|-----------------------|---------------------------------|------------------------|---------------------------------|-----------------------|
| <b>Outcome</b>                                                                                                                                                                                                       | <b>Entire cohort<br/>N=670097</b> |                       | <b>Term<br/>N=641487</b>        |                        | <b>Preterm<br/>N=28610</b>      |                       |
|                                                                                                                                                                                                                      | Treatment-<br>exposed<br>N=14868  | Nonexposed<br>N=65522 | Treatment-<br>exposed<br>N=6730 | Nonexposed<br>N=634757 | Treatment-<br>exposed<br>N=8138 | Nonexposed<br>N=20472 |
|                                                                                                                                                                                                                      | Median (IQR)                      | Median (IQR)          | Median (IQR)                    | Median (IQR)           | Median (IQR)                    | Median (IQR)          |
| <b>Psychological developmental disorders</b>                                                                                                                                                                         |                                   |                       |                                 |                        |                                 |                       |
| Specific developmental disorders of speech and language (F80)                                                                                                                                                        | 4.2 (3.2 to 5.4)                  | 4.6 (3.7 to 5.9)      | 4.6 (3.5 to 5.8)                | 4.6 (3.7 to 5.9)       | 4.0 (3.1 to 5.2)                | 4.3 (3.2 to 5.6)      |
| Specific developmental disorders of scholastic skills (F81)                                                                                                                                                          | 8.5 (6.9 to 10.1)                 | 9.1 (7.2 to 10.6)     | 9.2 (7.8 to 10.8)               | 9.1 (7.6 to 10.6)      | 8.4 (6.5 to 9.6)                | 9.1 (7.0 to 10.4)     |
| Specific developmental disorder of motor function (F82)                                                                                                                                                              | 3.7 (1.0 to 5.3)                  | 5.1 (3.2 to 6.3)      | 4.9 (2.3 to 6.3)                | 5.1 (3.4 to 6.3)       | 3.3 (0.9 to 5.1)                | 4.5 (1.6 to 5.9)      |
| Pervasive developmental disorder (F84)                                                                                                                                                                               | 5.7 (3.3 to 8.6)                  | 6.8 (4.0 to 9.5)      | 6.5 (4.1 to 8.8)                | 6.9 (4.0 to 9.6)       | 4.5 (3.0 to 8.1)                | 6.6 (3.9 to 9.0)      |
| Other or unspecified disorder of psychological development (F88, F89)                                                                                                                                                | 6.5 (4.5 to 8.9)                  | 7.3 (5.6 to 9.5)      | 6.3 (5.0 to 8.2)                | 7.4 (5.6 to 9.5)       | 6.5 (4.3 to 9.0)                | 6.7 (4.8 to 9.0)      |

|                                                                                                                                                                |                  |                  |                  |                  |                  |                  |
|----------------------------------------------------------------------------------------------------------------------------------------------------------------|------------------|------------------|------------------|------------------|------------------|------------------|
| <b>Neurosensory disorders</b>                                                                                                                                  |                  |                  |                  |                  |                  |                  |
| Vision or hearing loss (H54, H90, H91)                                                                                                                         | 3.6 (0.9 to 6.2) | 5.2 (2.1 to 6.8) | 4.3 (1.1 to 6.4) | 5.2 (2.2 to 6.9) | 3.6 (0.9 to 6.0) | 4.1 (1.2 to 6.3) |
| Epilepsy (G40, G41)                                                                                                                                            | 2.1 (0.7 to 4.3) | 3.0 (1.0 to 5.7) | 2.2 (0.7 to 4.3) | 3.0 (1.0 to 5.8) | 2.1 (0.7 to 4.2) | 2.3 (0.6 to 4.9) |
| Cerebral palsy (G80)                                                                                                                                           | 2.0 (1.2 to 3.6) | 1.9 (1.0 to 3.6) | 3.2 (1.6 to 4.6) | 1.9 (1.0 to 3.8) | 2.0 (1.1 to 3.5) | 1.6 (0.9 to 2.6) |
| F-, G-, and H-codes in parenthesis refer to International Statistical Classification of Diseases and Related Health Problems, tenth revision diagnostic codes. |                  |                  |                  |                  |                  |                  |

| <b>eTable 3.</b> Adjusted Hazard Ratios (HR) of Psychological Developmental and Neurosensory Disorders in Children Without Major Congenital Anomalies According to Maternal Antenatal Corticosteroid Treatment Exposure                                                                                                                                                                                                                                                                                                                                                                                                                                                                                                                                                                                                                                          |                                               |          |                                      |          |                                        |          |
|------------------------------------------------------------------------------------------------------------------------------------------------------------------------------------------------------------------------------------------------------------------------------------------------------------------------------------------------------------------------------------------------------------------------------------------------------------------------------------------------------------------------------------------------------------------------------------------------------------------------------------------------------------------------------------------------------------------------------------------------------------------------------------------------------------------------------------------------------------------|-----------------------------------------------|----------|--------------------------------------|----------|----------------------------------------|----------|
| <b>Outcome</b>                                                                                                                                                                                                                                                                                                                                                                                                                                                                                                                                                                                                                                                                                                                                                                                                                                                   | <b>Entire cohort<br/>N=638863<sup>a</sup></b> |          | <b>Term<br/>N=613198<sup>a</sup></b> |          | <b>Preterm<br/>N=25665<sup>a</sup></b> |          |
|                                                                                                                                                                                                                                                                                                                                                                                                                                                                                                                                                                                                                                                                                                                                                                                                                                                                  | <b>Adjusted<br/>HR<br/>(95% CI)</b>           | <b>P</b> | <b>Adjusted<br/>HR<br/>(95% CI)</b>  | <b>P</b> | <b>Adjusted<br/>HR<br/>(95% CI)</b>    | <b>P</b> |
| <b>Psychological developmental disorders</b>                                                                                                                                                                                                                                                                                                                                                                                                                                                                                                                                                                                                                                                                                                                                                                                                                     |                                               |          |                                      |          |                                        |          |
| Specific developmental disorders of speech and language (F80)                                                                                                                                                                                                                                                                                                                                                                                                                                                                                                                                                                                                                                                                                                                                                                                                    | 1.40 (1.28 to 1.53)                           | <.001    | 1.48 (1.31 to 1.68)                  | <.001    | 1.07 (0.93 to 1.23)                    | .37      |
| Specific developmental disorders of scholastic skills (F81)                                                                                                                                                                                                                                                                                                                                                                                                                                                                                                                                                                                                                                                                                                                                                                                                      | 1.29 (1.09 to 1.53)                           | .003     | 1.24 (0.96 to 1.61)                  | .10      | 1.10 (0.85 to 1.43)                    | .47      |
| Specific developmental disorder of motor function (F82)                                                                                                                                                                                                                                                                                                                                                                                                                                                                                                                                                                                                                                                                                                                                                                                                          | 1.35 (1.19 to 1.54)                           | <.001    | 1.29 (1.02 to 1.63)                  | .04      | 1.03 (0.86 to 1.24)                    | .74      |
| Pervasive developmental disorder (F84)                                                                                                                                                                                                                                                                                                                                                                                                                                                                                                                                                                                                                                                                                                                                                                                                                           | 1.38 (1.18 to 1.61)                           | <.001    | 1.38 (1.11 to 1.73)                  | .004     | 1.08 (0.83 to 1.40)                    | .58      |
| Other or unspecified disorder of psychological development (F88, F89)                                                                                                                                                                                                                                                                                                                                                                                                                                                                                                                                                                                                                                                                                                                                                                                            | 1.88 (1.55 to 2.27)                           | <.001    | 1.89 (1.47 to 2.43)                  | <.001    | 1.37 (0.96 to 1.95)                    | .08      |
| <b>Neurosensory disorders</b>                                                                                                                                                                                                                                                                                                                                                                                                                                                                                                                                                                                                                                                                                                                                                                                                                                    |                                               |          |                                      |          |                                        |          |
| Vision or hearing loss (H54, H90, H91)                                                                                                                                                                                                                                                                                                                                                                                                                                                                                                                                                                                                                                                                                                                                                                                                                           | 1.21 (1.00 to 1.48)                           | .05      | 1.15 (0.85 to 1.57)                  | .36      | 1.07 (0.79 to 1.44)                    | .69      |
| Epilepsy (G40, G41)                                                                                                                                                                                                                                                                                                                                                                                                                                                                                                                                                                                                                                                                                                                                                                                                                                              | 1.14 (0.92 to 1.40)                           | .23      | 1.43 (1.07 to 1.92)                  | .02      | 0.94 (0.68 to 1.29)                    | .68      |
| Cerebral palsy (G80)                                                                                                                                                                                                                                                                                                                                                                                                                                                                                                                                                                                                                                                                                                                                                                                                                                             | 1.41 (1.09 to 1.82)                           | .009     | 2.61 (1.68 to 4.05)                  | <.001    | 1.05 (0.78 to 1.44)                    | .72      |
| <sup>a</sup> In adjusted analyses sample size for the entire cohort of children is 612314, for term-born children 588199, and for preterm-born children 24115.<br>Adjusted for maternal age at delivery, parity, mode of delivery, maternal smoking during pregnancy, pre-pregnancy body mass index, premature rupture of membranes (O42), gestational diabetes (O24), hypertension in pregnancy (O10, O13-O15), and child sex, Apgar score (maximum of 1 and 5 min), admission to neonatal intensive care unit, weight and gestational age at birth; for child psychological development disorders adjusted additionally for maternal mental and behavioral disorder diagnoses (F00-F99), for child vision and hearing disorders, adjusted additionally for maternal eye, adnexa, ear and mastoid disorder diagnoses (H00-H95), for child epilepsy and cerebral |                                               |          |                                      |          |                                        |          |

palsy, adjusted additionally for maternal nervous system disorder diagnoses (G00-G99); F-, G-, H-, and O-codes in parenthesis refer to International Statistical Classification of Diseases and Related Health Problems, tenth revision diagnostic codes.

**eTable 4.** Adjusted Hazard Ratios (HR) of Psychological Developmental and Neurosensory Disorders in Children Born in 2006-2008 and 2009-2017 According to Maternal Antenatal Corticosteroid Treatment Exposure

| Outcome                                                               | Children born in 2006-2008<br>N=170361 <sup>a</sup> |          | Children born in 2009-2017<br>N=499736 <sup>a</sup> |          |
|-----------------------------------------------------------------------|-----------------------------------------------------|----------|-----------------------------------------------------|----------|
|                                                                       | Adjusted HR<br>(95% CI)                             | <i>P</i> | Adjusted HR<br>(95% CI)                             | <i>P</i> |
| <b>Psychological developmental disorders</b>                          |                                                     |          |                                                     |          |
| Specific developmental disorders of speech and language (F80)         | 1.56 (1.31 to 1.85)                                 | <.001    | 1.26 (1.15 to 1.39)                                 | <.001    |
| Specific developmental disorders of scholastic skills (F81)           | 1.59 (1.27 to 1.99)                                 | <.001    | 1.05 (0.85 to 1.30)                                 | .64      |
| Specific developmental disorder of motor function (F82)               | 1.59 (1.26 to 1.99)                                 | <.001    | 1.19 (1.03 to 1.36)                                 | .01      |
| Pervasive developmental disorder (F84)                                | 1.53 (1.17 to 2.00)                                 | .002     | 1.19 (1.00 to 1.42)                                 | .05      |
| Other or unspecified disorder of psychological development (F88, F89) | 2.34 (1.71 to 3.20)                                 | <.001    | 1.55 (1.25 to 1.92)                                 | <.001    |
| <b>Neurosensory disorders</b>                                         |                                                     |          |                                                     |          |
| Vision or hearing loss (H54, H90, H91)                                | 1.43 (1.10 to 1.86)                                 | .008     | 1.12 (0.92 to 1.38)                                 | .26      |
| Epilepsy (G40, G41)                                                   | 0.89 (0.62 to 1.29)                                 | .54      | 1.13 (0.91 to 1.39)                                 | .27      |
| Cerebral palsy (G80)                                                  | 1.17 (0.77 to 1.78)                                 | .55      | 1.18 (0.92 to 1.52)                                 | .22      |

<sup>a</sup>In adjusted analyses sample size for the cohort of children born in 2006-2008 is 161931, and for the children born in 2009-2017 it is 480227.  
F-, G-, and H-codes in parenthesis refer to International Statistical Classification of Diseases and Related Health Problems, tenth revision diagnostic codes.
